# Supplementary material for: Characteristics and Absorption Rate of Whey Protein Hydrolysates Prepared Using Flavourzyme after Treatment with Alcalase and Protamex
Source: MDPI journal article supplement (doi:10.3390/molecules28247969), 2023-12-06
Supplement: s1 [file s1]

---

## Supplementary data

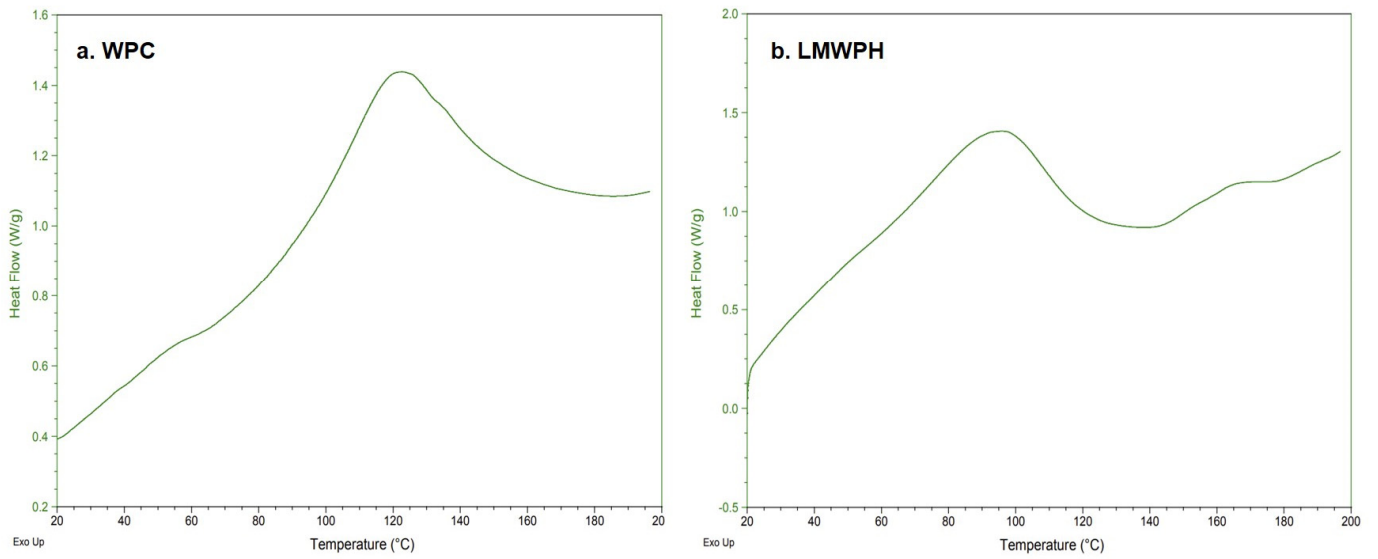

**Figure S1.** Differential scanning calorimetry thermogram of (a) whey protein concentrate (WPC) and (b) low-molecule whey protein hydrolysate (LMWPH). During scanning, the temperature was increased from 20 °C to 200 °C at a rate of 10 °C/min. WPC, whey protein concentrate; LMWPH, low-molecule whey protein hydrolysate.
